1 **DNA barcoding of fungal specimens using long-read high-throughput sequencing**

2

3 **Running title: High-throughput sequencing fungal specimens**

4

5 Kadri Runnel<sup>1,2\*</sup>, Kessy Abarenkov<sup>2,3</sup>, Ovidiu Copot<sup>1</sup>, Vladimir Mikryukov<sup>1</sup>, Urmas

6 Kõljalg<sup>1,3</sup>, Irja Saar<sup>1</sup>, Leho Tedersoo<sup>2,4</sup>

7

8 <sup>1</sup> Institute of Ecology and Earth Sciences, University of Tartu, Tartu, Estonia

9 <sup>2</sup> Mycology and Microbiology Center, University of Tartu, Tartu, Estonia

10 <sup>3</sup> Natural History Museum, University of Tartu, Tartu, Estonia

11 <sup>4</sup> College of Science, King Saud University, Riyadh, Saudi Arabia

12

13

14

## 15 Abstract

16 Molecular methods are increasingly used to identify species that lack conspicuous macro- or  
17 micromorphological characters. Taxonomic and ecological research teams barcode large  
18 numbers of collected voucher specimens annually. In this study we assessed the efficiency of  
19 long-read high throughput sequencing (HTS) as opposed to the traditionally used Sanger  
20 method for taxonomic identification of multiple vouchered fungal specimens, and providing  
21 reference information about intra-individual allele polymorphism. We developed a workflow  
22 based on a test-set of 423 fungal specimens (representing 205 species), PacBio HTS method,  
23 and ribosomal rRNA operon internal transcribed spacer (ITS) and 28S rRNA gene (LSU)  
24 markers. PacBio HTS had a higher success rate than Sanger sequencing at a comparable cost.  
25 Species identification based on PacBio reads was usually straightforward, because the  
26 dominant operational taxonomic unit (OTU) typically represented the targeted organism.  
27 Unlike the Sanger method, PacBio HTS enabled detecting widespread allele polymorphism  
28 within the ITS marker in the studied specimens. We conclude that multiplex DNA barcoding  
29 of the fungal ITS and LSU markers using a PacBio HTS is a useful tool for taxonomic  
30 identification of large amounts of collected voucher specimens at competitive price.  
31 Furthermore, PacBio HTS accurately recovers various alleles, which can provide crucial  
32 information for species delimitation and population-level studies.

33

34

## 35 Keywords

36 allele polymorphism, intragenomic diversity, species identification, long-read high-  
37 throughput sequencing

38

## 39 Introduction

40 A large proportion of living organisms can reliably be identified to species only based on  
41 molecular methods. Collected and vouchered specimens constitute a permanent record of  
42 biological diversity and form the basis of taxonomy as they provide material for description  
43 of new species and reference for taxonomic identification. The modern species identification  
44 relies increasingly on informative marker genes – termed as DNA barcodes (Hebert et al.,  
45 2003) – and sometimes on the entire genomes of organisms (Coissac et al., 2016; Misas et al.,  
46 2020). Because the DNA of non-living specimens degrades rapidly (Taylor & Swann, 1994),  
47 it is feasible to retrieve the molecular information in a reasonable time frame (usually within  
48 a few years following collection) to prevent loss of valuable genetic information. Large  
49 research teams of ecologists and taxonomists typically collect hundreds to tens of thousands  
50 of specimens annually, which necessitates efficient bulk analysis of large amounts of  
51 specimens in terms of cost, time, and labor (Hebert et al., 2018; Srivathsan et al., 2018).

52

53 DNA barcoding for taxonomic identification is traditionally performed using the Sanger  
54 sequencing method. Typically, one or several marker gene fragments are amplified and  
55 sequenced, allowing to produce up to 1000 base pair high-quality reads in a single pass,  
56 depending on the purity of DNA. The Sanger sequencing technology relies on chain  
57 termination signal averaged across all amplicons, and produces a consensus read of  
58 sequences of several marker gene alleles from the target specimen (Sanger et al., 1977). A  
59 well-known limitation of this approach is that the consensus read blurs the evolutionary  
60 signal among alleles. Additional technical shortfalls include low quality in the beginning of  
61 the sequence, disruption of reads in the case of length polymorphism in alleles, generation of  
62 ambiguous signal in the case of nucleotide substitutions, and failure to produce a readable

63 sequence if both the target and co-occurring organisms (e.g. contaminants) are amplified or  
64 when the amplicon is of low quantity or purity (Hyde et al., 2013).

65

66 To overcome the issues with Sanger sequencing, high-throughput sequencing (HTS) methods  
67 can alternatively be used for DNA barcoding (Coissac et al., 2016, Bohmann et al., 2020).

68 These methods include HTS-based analysis of single or multiple marker genes, genome  
69 skimming (i.e., low-coverage genome sequencing to retrieve long contigs of marker genes),  
70 and whole-genome sequencing. Genome-based methods are useful for obtaining full-length

71 marker genes for accurate identification and phylogenetic analyses, but they have a low

72 capacity to phase alleles differing by a few substitutions or indels >500 bases apart (Coissac

73 et al., 2016; Tedersoo et al., 2016). In addition, such methods are relatively costly, because

74 each sample requires preparation of a specific library and assembly from hundreds of

75 thousands to tens of millions of reads. Furthermore, no more than one or two marker genes

76 are still broadly used for DNA barcoding, except multi-gene phylogenetic analyses. Short-

77 read HTS platforms such as Illumina, Ion Torrent and DNBseq provide high-quality reads for

78 DNA fragments <550 base pairs, which may be insufficient for reliable identification and

79 phylogenetic analyses. In comparison, long-read and synthetic long-read sequencing methods

80 offer great promise for analysis of DNA markers up to ca. 3500 base pairs (Hebert et al.,

81 2018; Callahan et al., 2021; Karst et al., 2021). Despite high raw error rate, these methods are

82 highly accurate when calculating consensus (built-in option for PacBio and synthetic long-

83 reads). Long-read methods also enable to phase haplotypes, which is of great relevance in

84 population-level research (Tedersoo et al., 2021). Although these methods are relatively

85 costly, hundreds to thousands of samples can be multiplexed for a single run, bringing the

86 overall costs comparable to Sanger sequencing and one to three orders of magnitude less

87 compared with genome-based approaches (Hebert et al., 2018; Srivathsan et al., 2018).

88

89 The main purpose of this study was to assess the efficiency of long-read HTS for taxonomic  
90 identification of large sets of vouchered fungal specimens and providing reference  
91 information about intra-individual allele polymorphism. The latter is important to avoid  
92 describing artefactual “shadow taxa” (i.e., based on sequencing artefacts, rare alleles and  
93 pseudogenes; Thines et al., 2018; Porter & Hajibabaei, 2021) and inflating HTS-based  
94 biodiversity estimates. Here we developed a workflow based on PacBio multiplex DNA  
95 barcoding method and a test set of hundreds of fungal amplicons using the ribosomal rRNA  
96 operon internal transcribed spacer (ITS) and 28S rRNA gene (LSU) markers. These are the  
97 two most commonly used DNA barcodes for taxonomic identification of fungi and many  
98 protist groups (Pawlowski et al., 2012; Schoch et al., 2012). We demonstrate that the benefits  
99 of this multiplex DNA barcoding method include better recovery of low-quality samples and  
100 higher read quality compared with Sanger sequencing, as well as retrieval of multiple alleles  
101 differing by a single or more base pairs at a comparable cost.

102

103

## 104 [Materials and methods](#)

105

### 106 **Molecular analyses**

107 To test the relative performance of Sanger and PacBio sequencing on fruiting body samples,  
108 we compiled 423 vouchered specimens (polyporoid, resupinate, and agaricoid fruiting body  
109 types) belonging to 205 species from the fungarium of Natural History Museum of Tartu  
110 University (acronym TUF; Appendix 1). Most fruiting body samples were collected between  
111 2015 and 2020 (Table S1) for different ecological and taxonomic studies.

112

113 The DNA of specimens was extracted from roughly 0.1-1 mg dried material using  
114 ammonium sulphate lysis buffer (Anslan & Tedersoo, 2015) that provides sufficient DNA  
115 quality from fruiting body material (Tedersoo et al., 2016). For all samples, our DNA  
116 barcoding approach targeted the ITS region, and for one batch of samples we also analyzed  
117 the LSU. To cover the entire ITS region, we chose the primers ITS1catta (5'-  
118 ACCWGC GGARGGATCATTA-3') and ITS4ngsUni (5'-CCTSCSCTTANTDATATGC-3')  
119 for PCR. The ITS1catta primer has a high affinity to Dikarya and it avoids amplification of  
120 the common intron in the 3' end of the 18S region (Tedersoo & Anslan, 2019). Both primers  
121 were tagged with one of the 115, 12-base, sample-specific indices (Tedersoo & Anslan,  
122 2019). PCR was carried out in two replicates in the following thermocycling conditions: an  
123 initial 15 min at 95 °C, followed by 30 cycles of 95 °C for 30 s, 55 °C for 30 s, 72 °C for 1  
124 min, and a final cycle of 10 min at 72 °C. PCR products from replicate samples were pooled  
125 and their relative quantity was estimated by running 5 µl DNA on 1% agarose gel for 25 min.  
126 DNA samples with no visible bands were re-amplified with 35 cycles. To retrieve the LSU,  
127 we also amplified the DNA from a subset of 75 samples using the untagged primer LROR  
128 (5'-ACCCGCTGAACTTAAGC-3') and tagged primer LR5 (5'-  
129 TCCTGAGGGAACTTCG-3') and the above-described options. In total, our test set  
130 yielded 497 fungal amplicons.

131  
132 The PCR products were checked on a 1% agarose gel and the relative strength of the band  
133 was recorded at the scale of 0 (no band) to 5 (very strong band). It was also recorded whether  
134 there were a single or multiple bands on the gel. Altogether 20 µl of the PCR products were  
135 subjected to purification using Exo-SAP enzymatic treatment (Tedersoo et al., 2006) and  
136 shipped for Sanger sequencing in MacroGen, Inc., the Netherlands, using a single-pass with  
137 the untagged ITS4ngsUni primer (or LROR primer for LSU). Of the remaining PCR

138 products, between 1 and 10  $\mu$ l of amplicon were taken based on the strength of the band on  
139 the gel (categories 0 and 1, 10  $\mu$ l; category 5, 1  $\mu$ l), and pooled into five sequencing libraries  
140 for the ITS region and one library for the LSU region. The amplicon pools were purified  
141 using FavorPrep™ Gel/PCR Purification Kit (Favorgen-Biotech Corp., Austria), following  
142 the manufacturer's instructions, and subjected to SMRTbell library preparation and PacBio  
143 Sequel II sequencing on a single 8M SMRT cell in the University of Oslo, Norway.

144

145

#### 146 **Sequence data workflow**

147 The raw data were obtained in ab1 format for Sanger sequences and fastq format for PacBio  
148 sequences. Sanger sequences were inspected for quality using Sequencher v. 5.4.6 software.  
149 Sanger sequences were manually checked and trimmed to comprise only the full ITS region  
150 or LSU, or a shorter fragment in case of quality issues. PacBio reads were demultiplexed with  
151 Lima v.2.4.0 (<https://lima.how/>; PacBio, 2021) and quality-filtered following Tedersoo et al.,  
152 (2021). Sequences were trimmed to remove primers using cutadapt v.3.5 (Martin, 2011) and  
153 ITS region was extracted using ITSx v.1.1.3 (Bengtsson-Palme et al., 2013). ITS and LSU  
154 sequence data were processed separately using seqkit v.2.1.0 (Shen et al., 2016) and  
155 VSEARCH v.2.18.0 (Rognes et al., 2016). Reads were grouped into 100% sequence-  
156 similarity OTUs. Putative index-switches (also known as tag-jumps) were removed from the  
157 OTU table based on the UNCROSS2 score (Edgar, 2018).

158

159 The representative reads of each PacBio OTU and all Sanger sequences were identified  
160 against UNITE v.9.4b (Nilsson et al., 2018) and SILVA v.138.1 (Quast et al., 2013),  
161 respectively, using the BLASTn algorithm and 10 best database hits. Based on morphological  
162 identification of specimens, the PacBio OTUs and Sanger sequences were flagged as

163 potentially matching or potentially mismatching to the target taxa. The latter category  
164 suggested sequencing of naturally associated fungi, airborne or laboratory contaminants. We  
165 did not attempt to distinguish among these groups of unexpected taxa. For a comparison with  
166 Sanger sequencing, we only considered non-singleton OTUs with at least 1% relative  
167 abundance as putatively true alleles, while others were considered low-quality reads. For each  
168 sequenced specimen, we recorded the following properties: the overlap of PacBio OTUs with  
169 Sanger sequences from the same specimen (binary), the number of all non-singleton >1%-  
170 abundance PacBio OTUs and the number of potentially matching PacBio OTUs.

171

172 To calculate pairwise distances within specimens and species, sequences for each sample  
173 were aligned using mafft v7.487 (Kato et al., 2002). Using the dist.seqs command of mothur  
174 v1.46.1 (Schloss et al., 2009), we calculated the mean and maximum uncorrected pairwise  
175 distances of polymorphic alleles within each sample sequenced for the ITS region. We also  
176 recorded corresponding intraspecific distances for 11 species that were successfully  
177 sequenced in >5 samples. The samples sequenced for LSU were excluded, because these  
178 yielded less data and only a small proportion of samples sequenced for LSU had allele  
179 polymorphisms. In allelic comparisons, each pairwise distance represents the percent of  
180 mismatches (including indels), where gaps of any length were penalized once and end gaps  
181 were ignored.

182

183 We also estimated the reasons of sequencing failure. Sanger sequencing was considered  
184 failed when the read (1) represented a contaminant; (2) had an unreadable chromatogram; (3)  
185 had >5 ambiguous bases; or (4) had >50 bases were missing from either end (due to low-  
186 quality 5' or 3' end or sequence disruption by length polymorphism of alleles). The PacBio



187 sequencing was considered unsuccessful if the sample (1) yielded no sequence reads; (2) did  
188 not contain a correct fungus; or (3) the relative abundance of correct fungus was <10%.

189

190

## 191 **Statistical analyses**

192 We ran three sets of binomial regression models (logarithmic link function) using the glm  
193 function in the R base package. To test whether PacBio sequencing success is more probable  
194 for some particular cases of Sanger sequencing failure, we focused on samples that could not  
195 be successfully sequenced using Sanger method, and ran a model where PacBio success was  
196 a binary dependent variable and Sanger failure reason the sole categorical explanatory  
197 variable (four levels, see above). To test if the sequencing success across all samples  
198 depended on the relative strength of the PCR band or sample age (years since sampling), we  
199 ran models where either Sanger or PacBio success was a binary dependent variable and,  
200 respectively, the relative strength of PCR band or sample age was a sole continuous  
201 explanatory variable.

202

203

## 204 **Results**

205 For our samples, the total sequencing costs (incl. library preparation) were ca. 10% less for  
206 PacBio than Sanger method. For PacBio, 387 out of 497 samples (77.9%) were successfully  
207 sequenced compared with 275 samples when using Sanger (55.3%). Altogether 122 (25%) of  
208 all samples could be successfully sequenced with PacBio but not with Sanger, whereas the  
209 opposite happened to 15 (3.0%) of samples (Fig 1A). In general, there was a higher  
210 probability of successful PacBio outcome in cases where Sanger sequencing failed because of  
211 yielding only a partial readable sequence or a sequence containing some low-quality regions

212 (Table 1). The probability for both Sanger and PacBio success increased with the relative  
213 strength of the PCR band (Table 1, Fig 2A). The probability of PacBio sequencing success  
214 but not Sanger sequencing success significantly decreased with sample age (Table 1, Fig 2B).  
215 In 98% of the samples successfully sequenced with PacBio, the true target species was  
216 represented by the most abundant OTU.

217  
218 PacBio sequencing revealed ITS allele polymorphisms in 249 (75%) of samples that were  
219 successfully sequenced. These samples contained on average 5.1 (range 2 to 16) polymorphic  
220 alleles with >1% relative abundance. Each allele generally differed from all others by only a  
221 few base pairs, yielding an average intraindividual distance of 0.44% (range, 0.15% to  
222 2.88%) across all samples with allele polymorphisms. The average maximum distance across  
223 all samples with allele polymorphisms was 0.64% (range, 0.15% to 2.88%) (Fig 3B). The  
224 relative abundance of the most abundant allele and the total number of sequences in the  
225 sample were weakly correlated (Spearman  $r = 0.13$ , Fig 3A).

226  
227 We also checked among-individual, intraspecific variation for 11 species that were  
228 successfully sequenced in >5 samples (Table 2). Those species had in average 2.5  
229 polymorphic alleles per sequenced sample (min 0.29, max 5.17). The average and maximum  
230 intraspecific distance remained below 2% in all cases. The polypore *Sidera vulgaris*  
231 displayed the highest average and maximum intraspecific differences.

232  
233  
234

## 235 Discussion

236

### 237 1. Sequencing success

238

239 We demonstrated that sequencing of nearly 500 fungal amplicons using long-read HTS  
240 sequencing (PacBio) had a higher success rate compared to the traditional Sanger sequencing  
241 at comparable cost. Identifying the target species from PacBio samples was usually  
242 straightforward, as these were represented by the dominant OTU. However, contaminants  
243 were common and sometimes prevailed, especially in relatively old specimens. This indicates  
244 that taxonomic knowledge remains important when interpreting sequencing results (see Vu et  
245 al., 2018). We observed a rapid decay in PacBio sequencing success rate in >5-year-old  
246 specimens. Earlier studies have noticed a similar trend in Sanger sequencing (Larsson &  
247 Jacobsson, 2004). In the case of Sanger, we used single-end sequencing (as most taxonomic  
248 studies), additional sequencing of the complementary strand would have increased the  
249 success rate in samples with partial sequences, and low quality regions (Hyde et al., 2013).

250

251 There were two typical situations where the Sanger sequencing failed, but PacBio proved  
252 successful: length polymorphism of reads and field-contaminated samples. The length  
253 polymorphism in alleles caused disruption of Sanger reads but yielded no issues in PacBio.  
254 For example, in the boreal polypore species *Sidera vulgaris*, Sanger sequencing recovered a  
255 full-length read in 7% of the sequenced specimens, whereas PacBio was successful in 97% of  
256 specimens. The field-contamination was common in collections of the resupinate tropical  
257 *Tomentella* spp. and polypore *Rhodonina placenta*. In *R. placenta*, Sanger sequencing and  
258 PacBio sequencing were successful in 27% and 91% out of 11 specimens analyzed,  
259 respectively. It is worth noticing that we also adopted relatively stringent criteria for  
260 successful sequencing. If fruit body characteristics allowed restricting the species  
261 identification to a few options only, many of the “sequencing failures” were still informative  
262 for confirming the final identification.

263

264

## 265 **2. Allele polymorphism in studied samples**

266 Our workflow pointed to a widespread allele polymorphism within the ITS marker in the  
267 studied fungal collections. We consider most of the common variants as “true” alleles, since  
268 PacBio circular consensus sequencing yields high sequencing accuracy (Karst et al., 2021;  
269 Tedersoo et al., 2021) and we only addressed OTUs represented by >1 read and at least 1%  
270 total abundance, hence avoiding random PCR and sequencing errors (see also Ganley &  
271 Kobayashi, 2007). Our interpretation contrasts to Lindner et al., (2013), who ascribed  
272 intraindividual variation in a majority of 100 sampled fungal species to PCR and sequencing  
273 errors that were an order of magnitude more common in the now-obsolete 454  
274 pyrosequencing technology (Lindner et al., 2013). However, the alleles typically differed by a  
275 single or few positions, and the maximum intragenomic and intraspecific differences  
276 remained <2% (except in three samples). Metabarcoding studies typically use a 97%, 98% or  
277 98.5% ITS sequence similarity threshold for species-level separation and identification of  
278 taxa. Therefore, the observed differences typically remain within this threshold, especially  
279 when compared to the closest read (single-linkage clustering) or centroid (greedy clustering)  
280 based methods. However, when combined with geographic distance (population divergence),  
281 inappropriate clustering methods and accumulating sequencing errors, intraspecific  
282 differences may indeed account for artefactual, elevated richness in ecological studies.

283

284 Our results suggest that the exact sequence variant (ESV) based approaches (Callahan et al.,  
285 2017) are not optimal for species-level metabarcoding analyses of fungal diversity (see also  
286 Estensmo et al., 2021; Tedersoo et al., 2022) and perhaps eukaryotes in general (Antich et al.,  
287 2021; Porter & Hajibabaei, 2021), by potentially retrieving artefactual taxa. In conclusion,  
288 multiplex DNA barcoding of the fungal ITS marker using a PacBio third-generation HTS

289 protocol is a useful tool for taxonomic assessment of large sets of vouchered fungal  
290 specimens. Besides costs comparable to Sanger sequencing, PacBio HTS provides more  
291 complete and accurate recovery of various alleles, which can potentially be accounted for in  
292 bordering the molecular species or species hypotheses (Kõljalg et al., 2013) and used in  
293 population-level studies (Byrne et al., 2017).

294

295

## 296 Acknowledgements

297 The study was funded by the State Forest Management Centre (project “Enhancing the  
298 conservation performance of protected forest fragments” to K.R.), the Estonian Research  
299 Council (grants PRG632 and PRG1170), and the European Regional Development Fund  
300 (Centre of Excellence EcolChange). Rasmus Puusepp performed the laboratory work.

301

302

## 303 References

304

305 Anslan, S., & Tedersoo, L. (2015). Performance of cytochrome c oxidase subunit I (COI), ribosomal  
306 DNA Large Subunit (LSU) and Internal Transcribed Spacer 2 (ITS2) in DNA barcoding of  
307 Collembola. *European Journal of Soil Biology*, 69, 1–7.

308

309 Antich, A., Palacin, C., Wangenstein, O., S., & Turon, X. (2021). To denoise or to cluster, that is not  
310 the question: optimizing pipelines for COI metabarcoding and metaphylogeography. *BMC*  
311 *Bioinformatics*, 22, 1–24.

312

313 Bengtsson-Palme, J., Ryberg, M., Hartmann, M., Branco, S., Wang, Z., Godhe, A., De Wit, P.,  
314 Sánchez-García, M., Ebersberger, I., de Sousa, F., Amend, A., Jumpponen, A., Unterseher, M.,  
315 Kristiansson, E., Abarenkov, K., Bertrand, Y.J.K., Sanli, K., Eriksson, K.M., Vik, U., Veldre, V., &  
316 Nilsson, R.H. (2013). Improved software detection and extraction of ITS1 and ITS2 from ribosomal  
317 ITS sequences of fungi and other eukaryotes for analysis of environmental sequencing data. *Methods*  
318 *in Ecology and Evolution*, 4, 914–919. <https://doi.org/10.1111/2041-210X.12073>

319

320 Bohmann, K., Mirarab, S., Bafna, V., & Gilbert, M.T.P. (2020). Beyond DNA barcoding: The  
321 unrealized potential of genome skim data in sample identification. *Molecular Ecology*, 29, 2521–  
322 2534.

323

- 324 Byrne, A. Q., Rothstein, A. P., Poorten, T. J., Erens, J., Settles, M. L., & Rosenblum, E. B. (2017).  
325 Unlocking the story in the swab: A new genotyping assay for the amphibian chytrid fungus  
326 *Batrachochytrium dendrobatidis*. *Molecular Ecology Resources*, 17, 1283–1292.  
327
- 328 Callahan, B.J., Grinevich, D., Thakur, S., Balamotis, M.A., & Yehezekel, T.B. (2021). Ultra-accurate  
329 microbial amplicon sequencing with synthetic long reads. *Microbiome*, 9, 1–13.  
330
- 331 Callahan, B.J., McMurdie, P.J., & Holmes, S.P. (2017). Exact sequence variants should replace  
332 operational taxonomic units in marker-gene data analysis. *The ISME Journal*, 11, 2639–2643.  
333
- 334 Coissac, E., Hollingsworth, P., Laverigne, S., & Taberlet, P. (2016). From barcodes to genomes:  
335 extending the concept of DNA barcoding. *Molecular Ecology*, 25, 1423–1428.  
336
- 337 Edgar, R.C. (2018). UNCROSS2: identification of cross-talk in 16S rRNA OTU tables, *BioRxiv*,  
338 p.400762. <https://doi.org/10.1101/400762>  
339
- 340 Estensmo, E.L., Maurice, S., Morgado, L., Martin-Sanchez, P.M., Skrede, I., & Kausrud, H. (2021).  
341 The influence of intraspecific sequence variation during DNA metabarcoding: a case study of eleven  
342 fungal species. *Molecular Ecology Resources*, 21, 1141–1148.  
343
- 344 Ganley, A.R., & Kobayashi, T. (2007). Highly efficient concerted evolution in the ribosomal DNA  
345 repeats: total rDNA repeat variation revealed by whole-genome shotgun sequence data. *Genome*  
346 *research*, 17, 184–191.  
347
- 348 Hebert, P.D.N., Cywinska, A., Ball, S.L., & deWaard, J.R. (2003). Biological identifications through  
349 DNA barcodes. *Proceedings of the Royal Society of London*, 270, 313–321.  
350
- 351 Hebert, P.D.N., Braukmann, T.W.A., Prosser, S.W.J., Ratnasingham, S., deWaard, J.R., Ivanova,  
352 N.V., Janzen, D.H., Hallwachs, W., Naik, S., Sones, J.E., & Zakharov, E.V. (2018). A sequel to  
353 Sanger: amplicon sequencing that scales. *BMC Genomics*, 19, 1–14.  
354
- 355 Hyde, K.D., Udayanga, D., Manamgoda, D.S., Tedersoo, L., Larsson, E., Abarenkov, K., Bertrand,  
356 Y., Oxelman, B., Hartmann, M., Kausrud, H., Ryberg, M., Kristiansson, E., & Nilsson, R.H. (2013).  
357 Incorporating molecular data in fungal systematics: a guide for aspiring researchers. *Current Research*  
358 *in Environmental & Applied Mycology*, 3, 1–32.  
359
- 360 Karst, S.M., Ziels, R.M., Kirkegaard, R.H., Sørensen, E.A., McDonald, D., Zhu, Q., Knight, R., &  
361 Albertsen, M. (2021). High-accuracy long-read amplicon sequences using unique molecular  
362 identifiers with nanopore or PacBio sequencing. *Nature Methods*, 18, 165–169.  
363
- 364 Katoh, K., Misawa, K., Kuma, K., & Miyata, T. (2002). MAFFT: a novel method for rapid multiple  
365 sequence alignment based on fast Fourier transform. *Nucleic Acids Research*, 30, 3059–3066.  
366 doi:[10.1093/nar/gkf436](https://doi.org/10.1093/nar/gkf436)  
367
- 368 Kõljalg, U., Nilsson, R.H., Abarenkov, K., Tedersoo, L., Taylor, A.F., Bahram, M., Bates, S.T.,  
369 Bruns, T.D., Bengtsson-Palme, J., Callaghan, T.M., & Douglas, B. (2013). Towards a unified  
370 paradigm for sequence-based identification of fungi. *Molecular Ecology*, 22, 5271–5277.  
371
- 372 Larsson, E., & Jacobsson, S. (2004). Controversy over *Hygrophorus cossus* settled using ITS  
373 sequence data from 200 year-old type material. *Mycological Research*, 108, 781–786.  
374
- 375 Lindner, D.L., Carlsen, T., Henrik Nilsson, R., Davey, M., Schumacher, T., & Kausrud, H. (2013).  
376 Employing 454 amplicon pyrosequencing to reveal intragenomic divergence in the internal  
377 transcribed spacer rDNA region in fungi. *Ecology and Evolution*, 3, 1751–1764.

- 378  
379 Martin, M. Cutadapt removes adapter sequences from high-throughput sequencing reads. (2011)  
380 *EMBnet. Journal*, 17, 10–12.  
381  
382 Misas, E., Gómez, O., Botero, V., Muñoz, J., Teixeira, M., Gallo, J., Clay, O., & McEwen, J. (2020).  
383 Updates and comparative analysis of the mitochondrial genomes of *Paracoccidioides* spp. using  
384 Oxford Nanopore MinION sequencing. *Frontiers in Microbiology*, 11, 1751.  
385  
386 Nilsson, R.H., Larsson, K.-H., Taylor, A.F.S., Bengtsson-Palme, J., Jeppesen, T.S., Schigel, D.,  
387 Kennedy, P., Picard, K., Glöckner, F.O., Tedersoo, L., Saar, I., Kõljalg, U., & Abarenkov, K. (2018).  
388 The UNITE database for molecular identification of fungi: handling dark taxa and parallel taxonomic  
389 classifications. *Nucleic Acids Research*, 47:D1, D259–D264.  
390  
391 Pawlowski, J., Audic, S., & Adl, S. (2012). CBOL Protist Working Group: barcoding eukaryotic  
392 richness beyond the animal, plant, and fungal kingdoms. *PLoS Biology* 10, e1001419.  
393  
394 Porter, T.M., & Hajibabaei, M. (2021). Profile hidden Markov model sequence analysis can help  
395 remove putative pseudogenes from DNA barcoding and metabarcoding datasets. *BMC*  
396 *Bioinformatics*, 22, 1–20.  
397  
398 Quast, C., Pruesse, E., Yilmaz, P., Gerken, J., Schweer, T., Yarza, P., Peplies, J., & Glöckner, F.O.  
399 (2013) The SILVA ribosomal RNA gene database project: improved data processing and web-based  
400 tools. *Nucleic Acids Research*, 41:D1, D590–D596. <https://doi.org/10.1093/nar/gks1219>  
401  
402 Rognes, T., Flouri, T., Nichols, B., Quince, C., & Mahé, F. (2016). VSEARCH: a versatile open  
403 source tool for metagenomics. *PeerJ*, 4, e2584. <https://doi.org/10.7717/peerj.2584>  
404  
405 Sanger, F., Nicklen, S., & Coulson, A.R. (1977). DNA sequencing with chain-terminating inhibitors.  
406 *Proceedings of the National Academy of Sciences USA*, 74:5463–5467  
407  
408 Shen, W., Le, S., Li, Y., & Hu, F. (2016). SeqKit: A Cross-Platform and Ultrafast Toolkit for  
409 FASTA/Q File Manipulation. *PLOS One*, 11(10): e0163962.  
410 <https://doi.org/10.1371/journal.pone.0163962>  
411  
412 Schoch, C.L., Seifert, K.A., Huhndorf, S., Robert, V., Spouge, J.L., Levesque, C.A., Chen, W.,  
413 Bolchacova, E., Voigt, K., Crous, P.W., Miller, A.N., Wingfield, M.J., Aime, M.C., An, K.D., Bai,  
414 F.Y., Barreto, R.W., Begerow, D., Bergeron, M.J., Blackwell, M., Boekhout, T., Bogale, M.,  
415 Boonyuen, N., Burgaz, A.R., Buyck, B., Cai, L., Cai, Q., Cardinali, G., Chaverri, P., Coppins, B.J.,  
416 Crespo, A., Cubas, P., Cummings, C., Damm, U., de Beer, Z.W., de Hoog, G.S., Del-Prado, R.,  
417 Dentinger, B., Dieguez-Urbeondo, J., Divakar, P.K., Douglas, B., Duenas, M., Duong, T.A.,  
418 Eberhardt, U., Edwards, J.E., Elshahed, M.S., Fliiegerova, K., Furtado, M., Garcia, M.A., Ge, Z.W.,  
419 Griffith, G.W., Griffiths, K., Groenewald, J.Z., Groenewald, M., Grube, M., Gryzenhout, M., Guo,  
420 L.D., Hagen, F., Hambleton, S., Hamelin, R.C., Hansen, K., Harrold, P., Heller, G., Herrera, G.,  
421 Hirayama, K., Hirooka, Y., Ho, H.M., Hoffmann, K., Hofstetter, V., Hognabba, F., Hollingsworth,  
422 P.M., Hong, S.B., Hosaka, K., Houbraken, J., Hughes, K., Huhtinen, S., Hyde, K.D., James, T.,  
423 Johnson, E.M., Johnson, J.E., Johnston, P.R., Jones, E.B., Kelly, L.J., Kirk, P.M., Knapp, D.G.,  
424 Kõljalg, U., Kovacs, G.M., Kurtzman, C.P., Landvik, S., Leavitt, S.D., Ligtinstoffer, A.S.,  
425 Liimatainen, K., Lombard, L., Luangsa-Ard, J.J., Lumbsch, H.T., Maganti, H., Maharachchikumbura,  
426 S.S., Martin, M.P., May, T.W., McTaggart, A.R., Methven, A.S., Meyer, W., Moncalvo, J.M.,  
427 Mongkolsamrit, S., Nagy, L.G., Nilsson, R.H., Niskanen, T., Nyilasi, I., Okada, G., Okane, I.,  
428 Olariaga, I., Otte, J., Papp, T., Park, D., Petkovits, T., Pino-Bodas, R., Quaedvlieg, W., Raja, H.A.,  
429 Redecker, D., Rintoul, T., Ruibal, C., Sarmiento-Ramirez, J.M., Schmitt, I., Schussler, A., Shearer, C.,  
430 Sotome, K., Stefani, F.O., Stenroos, S., Stielow, B., Stockinger, H., Suetrong, S., Suh, S.O., Sung,  
431 G.H., Suzuki, M., Tanaka, K., Tedersoo, L., Telleria, M.T., Tretter, E., Untereiner, W.A., Urbina, H.,  
432 Vagvolgyi, C., Vialle, A., Vu, T.D., Walther, G., Wang, Q.M., Wang, Y., Weir, B.S., Weiss, M.,

- 433 White, M.M., Xu, J., Yahr, R., Yang, Z.L., Yurkov, A., Zamora, J.C., Zhang, N., Zhuang, W.Y., &  
434 Schindel, D. (2012). Nuclear ribosomal internal transcribed spacer (ITS) region as a universal DNA  
435 barcode marker for Fungi. *Proceedings of the National Academy of Sciences USA*, 109, 6241–6246.  
436
- 437 Schloss, P. D., Westcott, S. L., Ryabin, T., Hall, J. R., Hartmann, M., Hollister, E. B., Lesniewski,  
438 R.A., Oakley, B.B., Parks, D.H., Robinson, C.J., & Weber, C. F. (2009). Introducing mothur: open-  
439 source, platform-independent, community-supported software for describing and comparing microbial  
440 communities. *Applied and Environmental Microbiology*, 75, 7537–7541.  
441
- 442 Srivathsan, A., Baloğlu, B., Wang, W., Tan, W., Bertrand, D., Ng, A., Boey, E., Koh, J.,  
443 Nagarajan, N., & Meier, R. (2018). A MinIONTM-based pipeline for fast and costeffective  
444 DNA barcoding. *Molecular Ecology Resources*, 18, 1035–1049.  
445
- 446 Taylor, J.W., & Swann, E.C. (1994). DNA from herbarium specimens. In B., Herrmann, & S.,  
447 Hummel (Eds.), *Ancient DNA* (pp. 166–181). Springer.  
448
- 449 Thines, M., Crous, P.W., Aime, M.C., Aoki, T., Cai, L., Hyde, K.D., Miller, A.N., Zhang, N., &  
450 Stadler, M. (2018). Ten reasons why a sequence-based nomenclature is not useful for fungi anytime  
451 soon. *IMA Fungus*, 9, 177–183.  
452
- 453 Tedersoo, L., Albertsen, M., Anslan, S., & Callahan, B. (2021). Perspectives and benefits of high-  
454 throughput long-read sequencing in microbial ecology. *Applied and Environmental Microbiology*, 87,  
455 e00626-21.  
456
- 457 Tedersoo, L., & Anslan, S. (2019). Towards PacBio-based pan-eukaryote metabarcoding using full-  
458 length ITS sequences. *Environmental Microbiology Reports*, 11, 659–668.  
459
- 460 Tedersoo, L., Bahram, M., Zinger, L., Nilsson, H., Kennedy, P., Yang, T., Anslan, S., & Mikryukov,  
461 V. (2021). Best practices in metabarcoding of fungi: from experimental design to results. *Molecular*  
462 *Ecology*, **pending revision**.  
463
- 464 Tedersoo, L., Liiv, I., Kivistik, P.A., Anslan, S., Kõljalg, U., & Bahram, M. (2016). Genomics and  
465 metagenomics technologies to recover ribosomal DNA and single-copy genes from old fruitbody and  
466 ectomycorrhiza specimens. *MycKeys*, 13, 1-20.  
467
- 468 Tedersoo, L., Suvi, T., Larsson, E., & Kõljalg, U. (2006). Diversity and community structure of  
469 ectomycorrhizal fungi in a wooded meadow. *Mycological Research*, 110, 734–748.  
470 doi:10.1016/j.mycres.2006.04.00  
471
- 472 Vu, D., Groenewald, M., De Vries, M., Gehrman, T., Stielow, B., Eberhardt, U., Al-Hatmi, A.,  
473 Groenewald, J.Z., Cardinali, G., Houbraeken, J., & Boekhout, T. (2018). Large-scale generation and  
474 analysis of filamentous fungal DNA barcodes boosts coverage for kingdom fungi and reveals  
475 thresholds for fungal species and higher taxon delimitation. *Studies in Mycology*, 91, 23–36.  
476  
477

## 478 Data accessibility and benefit-sharing

479 Data accessibility: After the paper is published, the unique haplotype data will be made  
480 available through the PlutoF web platform.

481



482 Benefits Generated: Benefits from this research accrue from the sharing of our data and  
483 results on public databases as described above.

484

## 485 Author contributions

486 L.T and K.R conceived the research idea and designed the study, K.R and U.K collected data,  
487 K.R, L.T, I.S, V.M and O.C analyzed data, K.R and L.T wrote the paper, all authors  
488 discussed the results and commented on the manuscript.

489

490

491 Tables and figures

492  
493

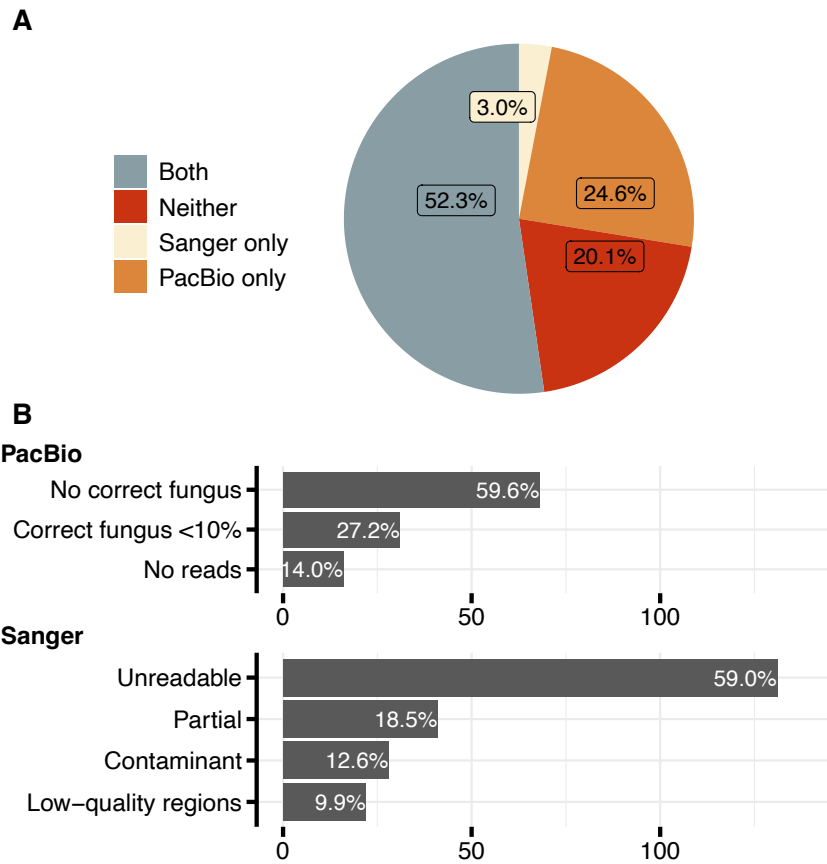

494  
495  
496  
497  
498  
499  
500  
501

**Fig 1.** The sequencing success of 497 fungal amplicons with Sanger and PacBio methods (A), and the reasons for failed sequencing (B).

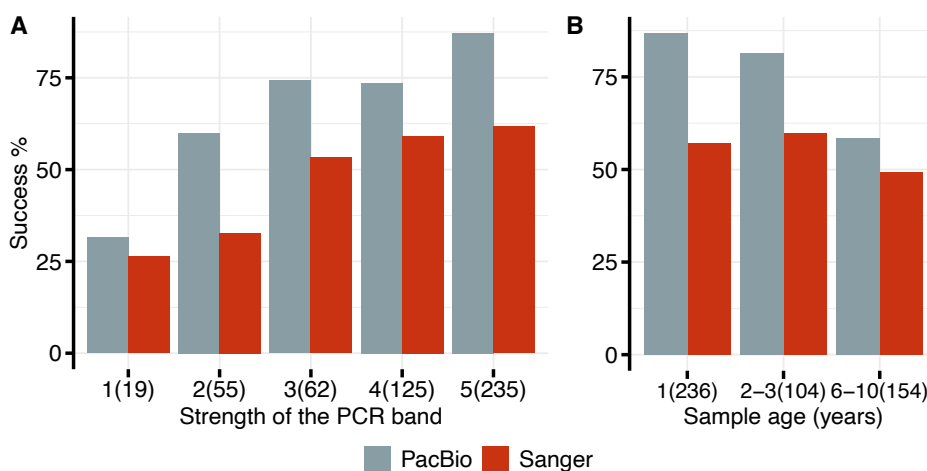

502  
503  
504  
505

**Fig 2.** Sequencing success with PacBio and Sanger sequencing at different strengths of the PCR band (A) and sample ages (B). No. of samples in parentheses. There was a single sample with no PCR band.

506  
507  
508

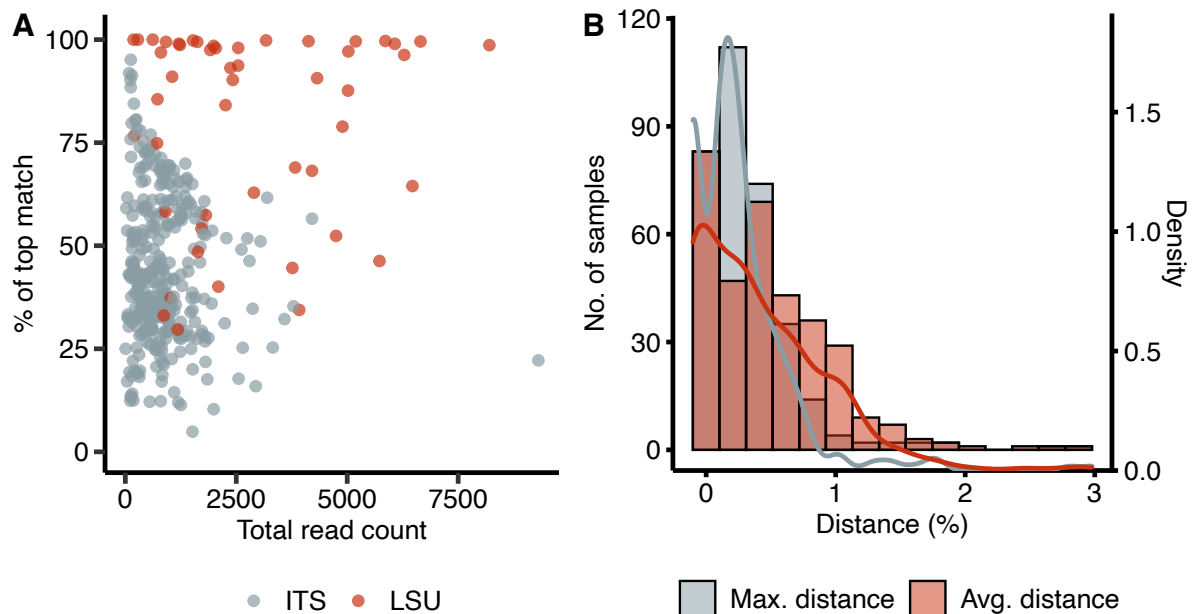

509  
510  
511  
512  
513  
514  
515  
516  
517  
518  
519  
520  
521

**Fig 3.** The major characteristics of successful PacBio samples. A: The relationships between total no. of sequences and relative abundance of the top (most abundant) allele. B: Count and density (probability density) of average and maximum distances between alleles in samples successfully sequenced for the ITS region. Distance is zero for samples with no allele polymorphism.

**Table 1.** Effects in the binomial regression models. “Sanger failure” is a categorical factor with four levels, where “partial sequence” is a reference group. p-values: \* < 0.05; \*\* < 0.01; \*\*\* < 0.001.

**PacBio success vs. Sanger failure reasons**

|                                | Estimate | Std error | z     | P      |     |
|--------------------------------|----------|-----------|-------|--------|-----|
| (Intercept)                    | 2.54     | 0.60      | 4.23  | <0.001 | *** |
| Sanger failure: unreadable     | -2.68    | 0.63      | -4.28 | <0.001 | *** |
| Sanger failure: contaminant    | -4.33    | 0.81      | -5.37 | <0.001 | *** |
| Sanger failure: low q. regions | -0.69    | 0.86      | -0.80 | 0.422  |     |

**Sanger success vs. PCR band strength**

|                   |       |      |       |        |     |
|-------------------|-------|------|-------|--------|-----|
| (Intercept)       | -1.19 | 0.33 | -3.61 | <0.001 | *** |
| PCR band strength | 0.35  | 0.08 | 4.45  | <0.001 | *** |

**Sanger success vs. sample age**

|             |       |      |       |       |    |
|-------------|-------|------|-------|-------|----|
| (Intercept) | 0.43  | 0.15 | 2.88  | 0.004 | ** |
| Sample age  | -0.07 | 0.04 | -1.82 | 0.069 | .  |

**PacBio success vs. PCR band strength**

|             |       |      |       |       |   |
|-------------|-------|------|-------|-------|---|
| (Intercept) | -0.79 | 0.34 | -2.34 | 0.019 | * |
|-------------|-------|------|-------|-------|---|

PCR band strength 0.52 0.09 6.02 <0.001 \*\*\*

**PacBio success vs. sample age**

(Intercept) 2.14 0.20 10.56 <0.001 \*\*\*

Sample age -0.29 0.05 -6.21 <0.001 \*\*\*

522

523

524

525

**Table 2.** Number of polymorphic alleles, and intraspecific distances in 11 studied species.

|                                 | <b>No. of samples</b> | <b>No. of polymorphic alleles</b> | <b>Min distance (%)</b> | <b>Max distance (%)</b> | <b>Average distance (%)</b> |
|---------------------------------|-----------------------|-----------------------------------|-------------------------|-------------------------|-----------------------------|
| <i>Antrodia piceata</i>         | 8                     | 6                                 | 0.171                   | 0.512                   | 0.262                       |
| <i>Antrodia serialis</i>        | 6                     | 19                                | 0.181                   | 1.093                   | 0.565                       |
| <i>Physisporinus vitreus</i> L4 | 7                     | 9                                 | 0.183                   | 0.730                   | 0.386                       |
| <i>Postia tephroleuca</i>       | 6                     | 12                                | 0.185                   | 0.750                   | 0.431                       |
| <i>Rhodonia placenta</i>        | 10                    | 24                                | 0.172                   | 1.382                   | 0.717                       |
| <i>Sidera vulgaris</i>          | 33                    | 140                               | 0.181                   | 1.828                   | 0.911                       |
| <i>Skeletocutis nemoralis</i>   | 10                    | 35                                | 0.167                   | 1.003                   | 0.510                       |
| <i>Skeletocutis semipileata</i> | 14                    | 61                                | 0.166                   | 1.815                   | 0.720                       |
| <i>Skeletocutis stellae</i>     | 6                     | 31                                | 0.174                   | 1.394                   | 0.681                       |
| <i>Tomentella</i> sp. 15        | 6                     | 2                                 | 0.173                   | 0.173                   | 0.173                       |
| <i>Tomentella</i> sp. 23        | 7                     | 2                                 | 0.175                   | 0.175                   | 0.175                       |

526

527

528

529

530

531
